# Supplementary material
Source: PubMed Central journal article supplement (PMC6613385)
Supplement: NIHMS1528916-supplement-Major_Resource_Table.pdf [file NIHMS1528916-supplement-Major_Resource_Table.pdf]

## Major Resources Tables

### Animals (in vivo studies)

| Species                            | Vendor or Source       | Background Strain | Sex             |
|------------------------------------|------------------------|-------------------|-----------------|
| Wild type mice                     | The Jackson Laboratory | C57 BL/6J         | Male and female |
| <i>Sirt1</i> <sup>Super</sup> mice | The Jackson Laboratory | C57 BL/6J         | Male and female |

### Antibodies

| Target antigen       | Vendor or Source                                 | Catalog #   | Working concentration                |
|----------------------|--------------------------------------------------|-------------|--------------------------------------|
| anti-SIRT1           | Cell Signaling Technology<br>(Danvers, MA, USA)  | 8469        | WB: 0.116 µg/mL<br>IHC: 1.16 µg/mL   |
| anti-pYAP            | Cell Signaling Technology                        | 4911S       | WB: 0.0592 µg/mL<br>IHC: 0.592 µg/mL |
| anti-MMP2            | Cell Signaling Technology                        | 4022S       | WB: 0.354 µg/mL                      |
| anti-iNOS            | Abcam (Cambridge, UK)                            | ab15323     | IHC: 2 µg/mL                         |
| anti-fibronectin     | Santa Cruz Biotechnology<br>(Dallas, Texas, USA) | sc-9068     | IHC: 2 µg/mL                         |
| anti-β-actin         | Santa Cruz Biotechnology                         | sc-47778    | WB: 0.2 µg/mL                        |
| anti-3-nitrotyrosine | Santa Cruz Biotechnology                         | sc-32757    | IHC: 2 µg/mL                         |
| anti-YAP             | Bethyl Laboratories<br>(Montgomery, Texas, USA)  | A302-309A-T | WB: 1 µg/mL<br>IHC: 10 µg/mL         |

### Cultured Cells

| Name                             | Vendor or Source               | Sex (F, M, or unknown) |
|----------------------------------|--------------------------------|------------------------|
| human aortic smooth muscle cells | Invitrogen (Carlsbad, CA, USA) | unknown                |
