# Supplementary material
Source: PubMed Central journal article supplement (PMC6613385)
Supplement: NIHMS1528916-supplement-Supplemental_Material.pdf [file NIHMS1528916-supplement-Supplemental_Material.pdf]

## Supplemental Data

### **Peroxynitrite-mediated SIRT1 Inactivation Contributes to Nicotine-induced Arterial Stiffness in Mice**

Ye Ding, Yi Han, Qiulun Lu, Junqing An, Huaiping Zhu, Zhonglin Xie, Ping Song,  
Ming-Hui Zou

Center for Molecular and Translational Medicine, Georgia State University,  
157 Decatur Street SE, Atlanta, GA 30303

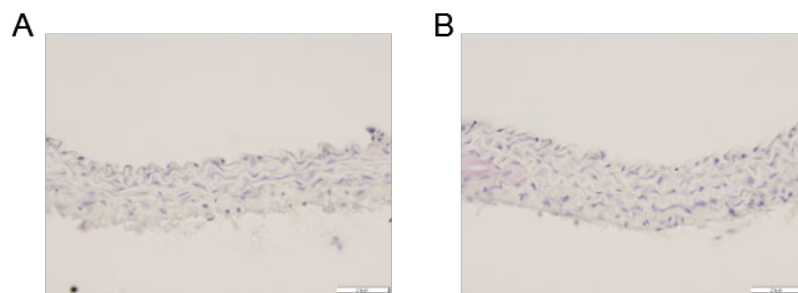

**Online Figure I.** Representative immunostaining for negative controls. **A**, Negative control for anti-Collagen I staining in Fig. 1F. **B**, Negative control for anti-Fibronectin staining in Fig. 1G.

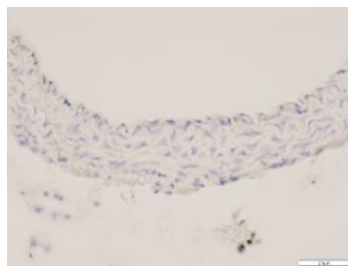

**Online Figure II.** Representative immunostaining for negative control of anti-SIRT1 staining in Fig. 2E.

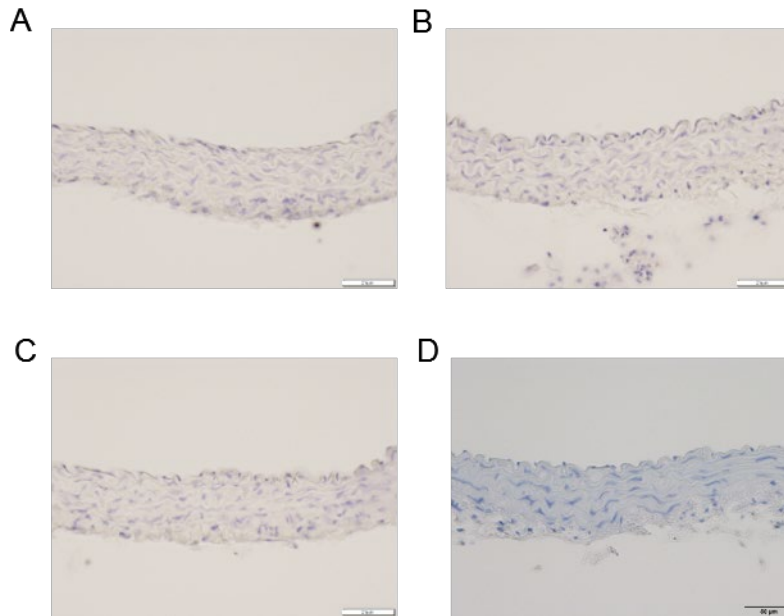

**Online Figure III.** Representative immunostaining for negative controls. **A**, Negative control for anti-SIRT1 staining in Fig. 4A. **B**, Negative control for anti-Collagen I staining in Fig. 4B. **C**, Negative control for anti-Fibronectin staining in Fig. 4C. **D**, Negative control for anti-MMP2 staining in Fig. 4E.

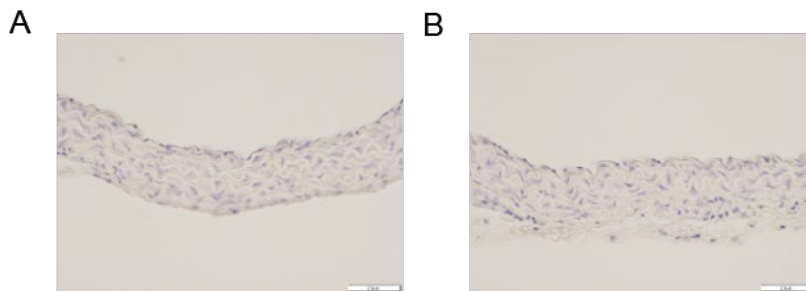

**Online Figure IV.** Representative immunostaining for negative controls. **A**, Negative control for anti-YAP staining in Fig. 5A. **B**, Negative control for anti-pYAP-S127 staining in Fig. 5B.

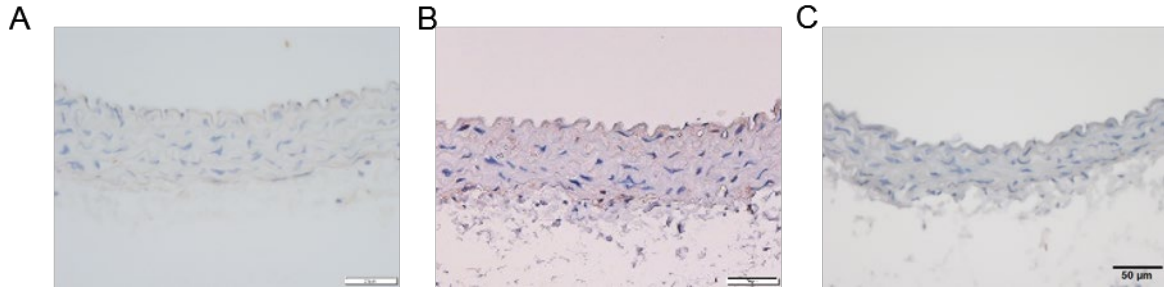

**Online Figure V.** Representative immunostaining for negative controls. **A**, Negative control for anti-iNOS staining in Fig. 6A. **B**, Negative control for anti-3-NT staining in Fig. 6B. **C**, Negative control for anti-3-NT staining in Fig. 6D.

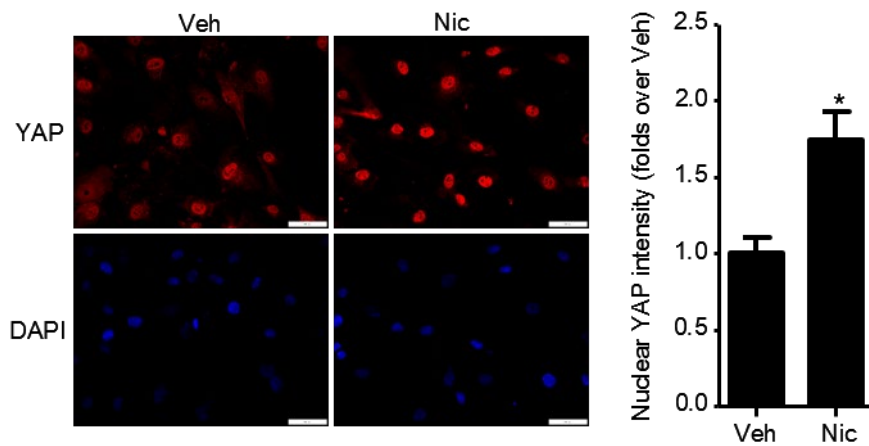

**Online Figure VI.** Representative immunofluorescence staining of YAP for vehicle or nicotine treated hASMCs. Nicotine (0.5  $\mu\text{M}$ ) treatment for 24 hours significantly increased YAP translocation from cytosol to nuclear in hASMCs.

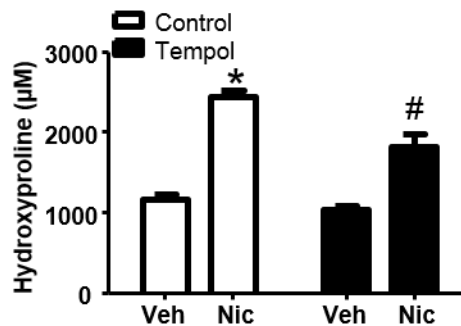

**Online Figure VII.** Hydroxyproline concentration in aortae from mice with/without nicotine treatment along with control or Tempol treatment (n=4; \*  $P < 0.01$  vs. Veh; #  $P < 0.01$  vs. Nic alone). Veh, vehicle; Nic, nicotine.
